# Supplementary material
Source: PubMed Central journal article supplement (PMC3707795)
Supplement: NIHMS477921-supplement-supplement_1.pdf [file NIHMS477921-supplement-supplement_1.pdf]

# **Web Appendix**

**Table A1: Summary Statistics by Quartile of Spending Intensity (More Variables)**

| Patient Group:   |                              | Local Floridians |         |         |         | Visitors |         |         |         |
|------------------|------------------------------|------------------|---------|---------|---------|----------|---------|---------|---------|
|                  |                              | Q1               | Q2      | Q3      | Q4      | Q1       | Q2      | Q3      | Q4      |
| Area-level       |                              |                  |         |         |         |          |         |         |         |
| Intensity Proxy: | Mean log(costs)   mortality  | 8.90             | 9.12 *  | 9.31 *  | 9.57 *  | 8.89     | 9.11 *  | 9.31 *  | 9.56 *  |
| Outcome          | Mortality                    | 0.058            | 0.061   | 0.052 * | 0.055   | 0.070    | 0.064   | 0.048 * | 0.049 * |
| Personal         | P(Mortality   X)             | 0.061            | 0.058   | 0.055 * | 0.054 * | 0.061    | 0.058 * | 0.054 * | 0.054 * |
| Characteristics  | Male                         | 0.526            | 0.518   | 0.521   | 0.511   | 0.624    | 0.605   | 0.630   | 0.634   |
|                  | Age                          | 73.5             | 72.4    | 71.3 *  | 70.4 *  | 72.5     | 71.2    | 70.1    | 67.0 *  |
| Race             | African American             | 0.054            | 0.095 * | 0.103 * | 0.180 * | 0.015    | 0.035 * | 0.028   | 0.084 * |
|                  | Hispanic                     | 0.019            | 0.034   | 0.123   | 0.255 * | 0.007    | 0.019   | 0.021   | 0.123 * |
|                  | White                        | 0.913            | 0.849 * | 0.755   | 0.535 * | 0.966    | 0.925 * | 0.938   | 0.745 * |
| ZIP Code of      | Median Household Income      | 36825            | 38531   | 38792   | 38123   | 47357    | 46572   | 49994   | 45527   |
| Residence        | Percent White                | 0.864            | 0.813 * | 0.801 * | 0.682 * | 0.874    | 0.838 * | 0.852   | 0.785 * |
| Characteristics  | Percent African American     | 0.079            | 0.126 * | 0.128 * | 0.228 * | 0.064    | 0.091 * | 0.077   | 0.117 * |
|                  | Percent Hispanic             | 0.080            | 0.082   | 0.174   | 0.315 * | 0.043    | 0.053   | 0.053   | 0.091 * |
|                  | Percent >65 years old        | 0.273            | 0.221 * | 0.190 * | 0.151 * | 0.140    | 0.143   | 0.141   | 0.135   |
|                  | Percent No HS Degree         | 0.198            | 0.188   | 0.226   | 0.260   | 0.161    | 0.173   | 0.158   | 0.186 * |
|                  | Percent HS Degree            | 0.332            | 0.302 * | 0.291 * | 0.261 * | 0.317    | 0.305   | 0.295 * | 0.290 * |
|                  | Percent Some College         | 0.287            | 0.296   | 0.278   | 0.265   | 0.266    | 0.262   | 0.262   | 0.253 * |
|                  | Percent College Degree       | 0.118            | 0.138   | 0.132   | 0.134   | 0.159    | 0.161   | 0.175   | 0.165   |
|                  | Percent Post College         | 0.065            | 0.076   | 0.074   | 0.081 * | 0.097    | 0.100   | 0.110   | 0.106   |
|                  | Median Rent                  | 534              | 551     | 554     | 599     | 515      | 519     | 553     | 538     |
|                  | Percent Rural                | 0.151            | 0.090   | 0.140   | 0.028 * | 0.304    | 0.302   | 0.244   | 0.235   |
|                  | Missing ZIP Code Information | 0.037            | 0.020 * | 0.032   | 0.010 * | 0.115    | 0.127   | 0.129   | 0.258 * |
| Payer            | Medicare                     | 0.652            | 0.616   | 0.577   | 0.439 * | 0.672    | 0.627   | 0.606   | 0.441 * |
| Categories       | Medicare HMO                 | 0.126            | 0.124   | 0.111   | 0.186   | 0.053    | 0.043   | 0.045   | 0.045   |
|                  | Medicaid                     | 0.026            | 0.035   | 0.052 * | 0.070 * | 0.006    | 0.012 * | 0.009   | 0.022 * |
|                  | Private Insurance            | 0.148            | 0.172 * | 0.198 * | 0.227 * | 0.220    | 0.263 * | 0.297 * | 0.351 * |
|                  | Other insurance              | 0.017            | 0.021   | 0.018   | 0.011   | 0.008    | 0.015 * | 0.009   | 0.018   |
|                  | Uninsured                    | 0.031            | 0.032   | 0.044 * | 0.067 * | 0.043    | 0.043   | 0.036   | 0.125 * |
| Comorbidities    | No Comorbidities             | 0.313            | 0.319   | 0.330 * | 0.355 * | 0.386    | 0.380   | 0.413   | 0.439 * |
|                  | AMI                          | 0.133            | 0.117   | 0.109 * | 0.095 * | 0.144    | 0.132   | 0.135   | 0.100 * |
|                  | Congestive Heart Failure     | 0.174            | 0.162   | 0.147 * | 0.142 * | 0.170    | 0.161   | 0.149 * | 0.165   |
|                  | C.O.P.D.                     | 0.288            | 0.285   | 0.287   | 0.246 * | 0.212    | 0.216   | 0.201   | 0.175 * |
|                  | Diabetes                     | 0.237            | 0.240   | 0.252   | 0.263 * | 0.200    | 0.213   | 0.198   | 0.211   |
|                  | Other Comorbidities          | 0.087            | 0.092 * | 0.086   | 0.086   | 0.072    | 0.086 * | 0.072   | 0.070   |
| Timing           | 1st Quarter                  | 0.286            | 0.278   | 0.270 * | 0.266 * | 0.522    | 0.458   | 0.498   | 0.399 * |
|                  | 2nd Quarter                  | 0.236            | 0.236   | 0.239   | 0.244 * | 0.196    | 0.212 * | 0.210   | 0.220   |
|                  | 3rd Quarter                  | 0.219            | 0.224   | 0.226   | 0.235 * | 0.091    | 0.128 * | 0.101   | 0.157 * |
|                  | 4th Quarter                  | 0.258            | 0.261   | 0.264   | 0.254   | 0.191    | 0.202   | 0.192   | 0.223 * |
|                  | Weekend                      | 0.281            | 0.277   | 0.272 * | 0.266 * | 0.286    | 0.283   | 0.281   | 0.293   |
| Area             | Per-diem in January          | 111              | 119     | 119     | 127 *   | 109      | 118     | 124     | 127 *   |
| Prices           | Per-diem in July             | 99               | 107     | 105     | 115 *   | 96       | 106 *   | 102     | 116 *   |
| Patient-level    | Hospital costs               | 7879             | 9022 *  | 9256 *  | 11648 * | 8729     | 9598    | 10131   | 14614 * |
| treatment        | log(Hospital costs)          | 8.61             | 8.75 *  | 8.78 *  | 8.92 *  | 8.70     | 8.79    | 8.84 *  | 9.12 *  |
|                  | Observations                 | 169575           | 216209  | 144681  | 219297  | 8436     | 10149   | 9655    | 8945    |

\*=significantly different from bottom quartile at the 5% level, computed using standard errors clustered at the Health Service Area level. ZIP code characteristics reported for those with ZIP code information.

Table A2: American Travel Survey:  
 Characteristics of Visitors Across Cities, by Quartile of Spending Intensity

|                                                |                            | All ages |         |         |          | Age >= 45 |         |         |         |
|------------------------------------------------|----------------------------|----------|---------|---------|----------|-----------|---------|---------|---------|
| Metropolitan Area Spending Intensity Quartile: |                            | Q1       | Q2      | Q3      | Q4       | Q1        | Q2      | Q3      | Q4      |
| <b>Individual:</b>                             | White                      | 0.904    | 0.883   | 0.811   | 0.893    | 0.938     | 0.902   | 0.880   | 0.922   |
|                                                | Black                      | 0.069    | 0.060   | 0.087   | 0.062    | 0.044     | 0.037   | 0.072   | 0.049   |
|                                                | Other race                 | 0.027    | 0.057   | 0.102   | 0.045    | 0.018     | 0.061   | 0.048   | 0.029   |
|                                                | Hispanic                   | 0.047    | 0.052   | 0.090   | 0.046    | 0.027     | 0.042   | 0.039   | 0.042   |
|                                                | Age                        | 37.8     | 38.2    | 38.0    | 39.5     | 57.0      | 57.4    | 58.4    | 57.1    |
|                                                | Age >= 65                  | 0.079    | 0.086   | 0.110   | 0.096    | 0.205     | 0.210   | 0.277   | 0.215   |
|                                                | Male                       | 0.529    | 0.543   | 0.540   | 0.538    | 0.552     | 0.555   | 0.552   | 0.552   |
|                                                | Married                    | 0.578    | 0.580   | 0.555   | 0.583    | 0.780     | 0.773   | 0.747   | 0.803   |
| Origin:                                        | Midwest                    | 0.156    | 0.139   | 0.126   | 0.149    | 0.167     | 0.135   | 0.097   | 0.164   |
|                                                | Northeast                  | 0.195    | 0.265   | 0.205   | 0.232    | 0.196     | 0.261   | 0.212   | 0.233   |
|                                                | South                      | 0.621    | 0.557   | 0.638   | 0.551    | 0.601     | 0.571   | 0.659   | 0.525   |
|                                                | West                       | 0.028    | 0.040   | 0.031   | 0.068    | 0.036     | 0.033   | 0.032   | 0.078   |
| Reason                                         | Vacation                   | 0.511    | 0.538   | 0.555   | 0.509    | 0.487     | 0.437   | 0.446   | 0.481   |
|                                                | Business                   | 0.193    | 0.208   | 0.162   | 0.184    | 0.194     | 0.277   | 0.215   | 0.224   |
| <b>Household:</b>                              | Size = 1                   | 0.097    | 0.105   | 0.096   | 0.091    | 0.156     | 0.184   | 0.158   | 0.119   |
|                                                | Size = 2                   | 0.359    | 0.287   | 0.310   | 0.307    | 0.505     | 0.433   | 0.506   | 0.481   |
|                                                | Size >2                    | 0.543    | 0.608   | 0.594   | 0.602    | 0.338     | 0.383   | 0.337   | 0.401   |
|                                                | Income <30K                | 0.193    | 0.239   | 0.263   | 0.246    | 0.237     | 0.232   | 0.272   | 0.229   |
|                                                | Income >30K <50K           | 0.306    | 0.267   | 0.315   | 0.307    | 0.331     | 0.296   | 0.343   | 0.333   |
|                                                | Income >50K <75K           | 0.223    | 0.288   | 0.227   | 0.245    | 0.246     | 0.266   | 0.222   | 0.250   |
|                                                | Income >75K                | 0.277    | 0.206   | 0.196   | 0.202    | 0.186     | 0.207   | 0.162   | 0.188   |
|                                                | # of Vehicles              | 2.00     | 1.94    | 2.04    | 2.11     | 2.21      | 1.98    | 1.87    | 2.05    |
|                                                | Married w/ children        | 0.385    | 0.405   | 0.399   | 0.404    | 0.150     | 0.106   | 0.130   | 0.168   |
| <b>Household:</b>                              | Less than HS               | 0.237    | 0.223   | 0.261   | 0.204    | 0.097     | 0.078   | 0.139   | 0.065   |
| <b>Head</b>                                    | HS degree                  | 0.193    | 0.206   | 0.189   | 0.203    | 0.280     | 0.254   | 0.266   | 0.256   |
| Education:                                     | Some college               | 0.264    | 0.255   | 0.256   | 0.262    | 0.273     | 0.300   | 0.293   | 0.331   |
|                                                | College degree             | 0.184    | 0.186   | 0.199   | 0.221    | 0.209     | 0.185   | 0.208   | 0.196   |
|                                                | Graduate degree            | 0.123    | 0.131   | 0.096   | 0.110    | 0.141     | 0.183   | 0.094   | 0.151   |
| Work:                                          | Retired                    | 0.083    | 0.078   | 0.095   | 0.099    | 0.213     | 0.189   | 0.235   | 0.220   |
|                                                | Full time                  | 0.531    | 0.547   | 0.479   | 0.541    | 0.602     | 0.560   | 0.512   | 0.583   |
|                                                | Part time                  | 0.047    | 0.075   | 0.090   | 0.061    | 0.064     | 0.109   | 0.130   | 0.062   |
|                                                | Homemaker                  | 0.105    | 0.073   | 0.075   | 0.078    | 0.100     | 0.115   | 0.092   | 0.117   |
|                                                | Home owner                 | 0.745    | 0.721   | 0.709   | 0.770    | 0.867     | 0.854   | 0.832   | 0.892   |
|                                                | Person-trip Obs (raw)      | 2650     | 4637    | 3484    | 6633     | 1108      | 1964    | 1483    | 2897    |
|                                                | Person-trip Obs (weighted) | 4858947  | 8684969 | 6521168 | 12683341 | 1880772   | 3555479 | 2589725 | 5662312 |
|                                                | Number of Metro Areas      | 3        | 4       | 4       | 2        | 3         | 4       | 4       | 2       |

Data represent 13 metropolitan areas available in the 1995 American Travel Survey (ATS). Each cell represents a weighted average of the traveller's characteristic, using the person-trip weights provided in the ATS. To categorize these metropolitan areas, the quartiles are based on the end-of-life spending measure calculated at the metropolitan-area level. Q1 is Sarasota, Pensacola, and Fort Myers; Q2 is Tampa, Melbourne, West Palm Beach, and Tallahassee; Q3 is Daytona, Jacksonville, Fort Luderdale, and Lakeland; Q4 is Orlando and Miami.

**Table A3: Reduced-Form Estimates (Selected Covariates)**

| Dependent Variable: Mortality                                     |                                                                      | Coeff.        | S.E.     |
|-------------------------------------------------------------------|----------------------------------------------------------------------|---------------|----------|
| Local Area                                                        | Local area: mean log(costs)   mortality                              | -0.028        | (0.0082) |
| Age Indicators<br>(60 years old excluded)                         | Age<=20                                                              | 0.054         | (0.033)  |
|                                                                   | Age>20 & Age<30                                                      | -0.013        | (0.018)  |
|                                                                   | Age = 35                                                             | -0.036        | (0.012)  |
|                                                                   | Age = 45                                                             | -0.004        | (0.019)  |
|                                                                   | Age = 55                                                             | -0.027        | (0.013)  |
|                                                                   | Age = 65                                                             | -0.013        | (0.015)  |
|                                                                   | Age = 75                                                             | 0.010         | (0.019)  |
|                                                                   | Age = 85                                                             | 0.039         | (0.018)  |
|                                                                   | Age = 95                                                             | 0.033         | (0.044)  |
|                                                                   | Age >= 100                                                           | 0.061         | (0.087)  |
| Race                                                              | African American                                                     | 0.007         | (0.008)  |
|                                                                   | White                                                                | 0.011         | (0.008)  |
| Sex                                                               | Male                                                                 | -0.003        | (0.003)  |
| Time of Year                                                      | 1st quarter                                                          | -0.010        | (0.003)  |
|                                                                   | 2nd quarter                                                          | 0.007         | (0.004)  |
|                                                                   | 3rd quarter                                                          | 0.002         | (0.005)  |
| Day of Week<br>(Monday excluded)                                  | Friday                                                               | -0.005        | (0.005)  |
|                                                                   | Saturday                                                             | -0.002        | (0.005)  |
|                                                                   | Sunday                                                               | -0.000        | (0.004)  |
| Primary Payer<br>(uninsured excluded)                             | Medicare fee for service                                             | -0.015        | (0.006)  |
|                                                                   | Medicare HMO                                                         | -0.010        | (0.009)  |
|                                                                   | Medicaid                                                             | -0.013        | (0.012)  |
|                                                                   | Commercial Insurance                                                 | -0.026        | (0.004)  |
|                                                                   | Other insurance                                                      | -0.009        | (0.011)  |
| Comorbidities<br>(no comorbidities<br>excluded)                   | Prior AMI                                                            | 0.008         | (0.004)  |
|                                                                   | Congestive Heart Failure                                             | 0.073         | (0.006)  |
|                                                                   | Chronic Obstructive Pulmonary Disease                                | 0.006         | (0.003)  |
|                                                                   | Diabetes                                                             | -0.001        | (0.003)  |
|                                                                   | Other Comorbidities                                                  | 0.026         | (0.005)  |
| Primary Diagnosis                                                 | AMI                                                                  | 0.040         | (0.004)  |
|                                                                   | Cardiac dysrhythmias                                                 | -0.010        | (0.003)  |
|                                                                   | Heart failure                                                        | 0.000         | (0.000)  |
| ZIP Code of Residence<br>Characteristics<br><br>(College omitted) | Median income<30,000 (compared to >80,000)                           | -0.005        | (0.012)  |
|                                                                   | Fraction with Less than HS Degree                                    | -0.006        | (0.037)  |
|                                                                   | Fraction with HS Degree only                                         | 0.026         | (0.044)  |
|                                                                   | Fraction with some college                                           | 0.029         | (0.050)  |
|                                                                   | Fraction with post-college                                           | 0.003         | (0.058)  |
|                                                                   | Fraction White                                                       | -0.007        | (0.035)  |
|                                                                   | Fraction African American                                            | -0.030        | (0.032)  |
|                                                                   | Fraction Hispanic                                                    | -0.020        | (0.029)  |
|                                                                   | Percent over the age of 65                                           | -0.082        | (0.025)  |
|                                                                   | Percent Rural                                                        | -0.007        | (0.005)  |
|                                                                   | Median Rent                                                          | 5.65e-07      | 1.48e-05 |
|                                                                   | Missing ZIP code information<br>(includes missing state information) | -0.010        | (0.007)  |
|                                                                   | Area Prices                                                          | Per Diem June | 0.0003   |
| Per Diem January                                                  |                                                                      | -0.0003       | (0.0001) |
| Year                                                              | Year = 1997                                                          | -0.005        | (0.005)  |
|                                                                   | Year = 1998                                                          | -0.010        | (0.006)  |
|                                                                   | Year = 1999                                                          | -0.009        | (0.005)  |
|                                                                   | Year = 2000                                                          | -0.002        | (0.005)  |
|                                                                   | Year = 2001                                                          | -0.007        | (0.005)  |
|                                                                   | Year = 2002                                                          | -0.005        | (0.005)  |
|                                                                   | Year = 2003                                                          | -0.013        | (0.006)  |
|                                                                   | Observations                                                         | 37185         |          |
|                                                                   | Mean of Dep. Variable                                                | 0.058         |          |

The model is from Table 2B, Column (6). It is estimated by OLS and the standard errors are clustered at the Health Service Area level. Models include indicators for each age, day of the week, 5-year age indicators interacted with the white indicator, as well.

**Table A4: Heart-Related Emergency Results Across Patient Types**

**Dependent Variable: Mortality**

| <b>A. Race &amp; Sex</b>                | <b>Race</b>          |                  | <b>Sex</b>        |                   |
|-----------------------------------------|----------------------|------------------|-------------------|-------------------|
|                                         | African Amer.<br>(1) | Hispanic<br>(2)  | Male<br>(3)       | Female<br>(4)     |
| Local area: mean log(costs)   mortality | -0.033<br>(0.028)    | 0.002<br>(0.028) | -0.030<br>(0.009) | -0.037<br>(0.014) |
| Observations                            | 1487                 | 1588             | 23136             | 14049             |
| Mean of Dep. Var.                       | 0.048                | 0.050            | 0.054             | 0.064             |

  

| <b>B. Insurance Status</b> | Private<br>(5)                          | Public<br>(6)     | Uninsured<br>(7)  |
|----------------------------|-----------------------------------------|-------------------|-------------------|
|                            | Local area: mean log(costs)   mortality | -0.012<br>(0.008) | -0.033<br>(0.012) |
| Observations               | 10966                                   | 23979             | 2240              |
| Mean of Dep. Var.          | 0.036                                   | 0.067             | 0.061             |

  

| <b>C. Home Region</b>                     | <b>Census Region</b> |                   |                   |                   | <b>Exclude Missing<br/>State/ZIP<br/>(12)</b> |
|-------------------------------------------|----------------------|-------------------|-------------------|-------------------|-----------------------------------------------|
|                                           | Northeast<br>(8)     | Midwest<br>(9)    | West<br>(10)      | South<br>(11)     |                                               |
| local area: mean log(charges)   mortality | -0.043<br>(0.011)    | -0.021<br>(0.015) | -0.035<br>(0.033) | -0.035<br>(0.011) | -0.035<br>(0.010)                             |
| Observations                              | 11869                | 9278              | 1403              | 8380              | 31388                                         |
| Mean of Dep. Var.                         | 0.062                | 0.053             | 0.073             | 0.057             | 0.059                                         |

  

| <b>D. Models with Destination Controls</b> | 2000 Census<br>County Controls<br>(13)  | 1995 Amer.<br>Travel Survey<br>Controls<br>(14) |
|--------------------------------------------|-----------------------------------------|-------------------------------------------------|
|                                            | Local area: mean log(costs)   mortality | -0.031<br>(0.010)                               |
| Observations                               | 37185                                   | 29184                                           |
| Mean of Dep. Var.                          | 0.058                                   | 0.058                                           |

Each cell represents a separate regression with full controls. The models are estimated by OLS and the standard errors are clustered at the Health Service Area level. Business destinations include the cities where the fraction of visitors whose reason for travel is business in the 1995 American Travel Survey is greater than the median city. Uninsured is defined as charity care, self pay, or less than 30% coverage.

Table A5: Results for Frequent Diagnoses & Across Illness Severity Levels

| Dependent Variable: Mortality                       |                                                                       | Local area: mean<br>log(costs)   mortality |        |            |        |
|-----------------------------------------------------|-----------------------------------------------------------------------|--------------------------------------------|--------|------------|--------|
|                                                     | 3-Digit ICD9-CM Diagnosis Codes                                       | Mortality<br>Rate                          | Coeff. | S.E.       | Obs.   |
| <b>Top 10 Most Frequent<br/>Emergency Diagnoses</b> | 410 Acute myocardial infarction                                       | 0.089                                      | -0.033 | (0.013)**  | 15069  |
|                                                     | 414 Other chronic ischemic heart disease                              | 0.007                                      | 0.0020 | (0.0029)   | 11970  |
|                                                     | 427 Cardiac dysrhythmias                                              | 0.030                                      | -0.033 | (0.011)*** | 9832   |
|                                                     | 428 Heart failure                                                     | 0.042                                      | -0.029 | (0.011)**  | 12284  |
|                                                     | 434 Occlusion of cerebral arteries (stroke)                           | 0.063                                      | -0.029 | (0.016)*   | 6409   |
|                                                     | 486 Pneumonia                                                         | 0.040                                      | -0.008 | (0.011)    | 11207  |
|                                                     | 491 Chronic bronchitis                                                | 0.028                                      | -0.005 | (0.011)    | 6123   |
|                                                     | 780 General symptoms                                                  | 0.003                                      | 0.0033 | (0.0027)   | 9008   |
|                                                     | 786 Symptoms involving respiratory system<br>and other chest symptoms | 0.001                                      | -0.001 | (0.0014)   | 13792  |
|                                                     | 820 Fracture of neck of femur (hip fracture)                          | 0.024                                      | -0.012 | (0.012)    | 5297   |
| <b>Pooled Diagnoses</b>                             | All Emergency admissions                                              | 0.039                                      | -0.010 | (0.0049)** | 272772 |

Each row represents a separate regression with full controls, as in column (6) of Table 2. The models are estimated by OLS and the standard errors are clustered at the Health Service Area level. Each sub-sample is restricted to patients from states with at least 5 observations. \*=10%; \*\*=5%; \*\*\*=1%.

**Table A6: (Selected) Visitor Characteristics: HSA Subsamples**

**A. Major League Baseball Spring Training Counties in First Quarter**

| Variable                 |                             | Low-Spending HSA |         | High-Spending HSA |         |
|--------------------------|-----------------------------|------------------|---------|-------------------|---------|
|                          |                             | Mean             | Std Dev | Mean              | Std Dev |
| <b>Local-area level:</b> |                             |                  |         |                   |         |
| Treatment                | Mean log(costs)   mortality | 8.96             | 0.11    | 9.30              | 0.15    |
| Personal Characteristics | Male                        | 0.64             | 0.48    | 0.63              | 0.48    |
|                          | Age                         | 72.8             | 10.4    | 71.9              | 11.4    |
| Race                     | White                       | 0.98             | 0.14    | 0.94              | 0.24    |
| Comorbidities            | No Comorbidities            | 0.40             | 0.49    | 0.41              | 0.49    |
| Area Prices              | Per-diem in January         | 115.00           | 12.20   | 115.89            | 9.21    |
|                          | Observations                | 4293             |         | 4318              |         |

**B. Excluding Top 30% Most Costly HSAs**

| Variable                 |                             | Low-Spending HSA |         | High-Spending HSA |         |
|--------------------------|-----------------------------|------------------|---------|-------------------|---------|
|                          |                             | Mean             | Std Dev | Mean              | Std Dev |
| <b>Local-area level:</b> |                             |                  |         |                   |         |
| Treatment                | Mean log(costs)   mortality | 8.95             | 0.11    | 9.23              | 0.08    |
| Personal Characteristics | Male                        | 0.62             | 0.49    | 0.62              | 0.49    |
|                          | Age                         | 71.9             | 11.7    | 71.5              | 12.1    |
| Race                     | White                       | 0.96             | 0.21    | 0.93              | 0.25    |
| Comorbidities            | No Comorbidities            | 0.38             | 0.49    | 0.40              | 0.49    |
| Area Prices              | Per-diem in January         | 103.76           | 17.77   | 113.55            | 16.27   |
|                          | Observations                | 12862            |         | 13498             |         |

High- and low-spending areas are defined by the median of the local-area treatment measure: mean log costs conditional on mortality for the HSA.

**Table A7: Robustness**

Dependent Variable: Mortality

|                                           | Probit<br>(marginal<br>effect) | ZIP Code<br>Fixed<br>Effects | Local Area<br>measure<br>quartiles | Spending:<br>Bottom<br>3 Quartiles | Measure:                            |                                     |                                                               |
|-------------------------------------------|--------------------------------|------------------------------|------------------------------------|------------------------------------|-------------------------------------|-------------------------------------|---------------------------------------------------------------|
|                                           |                                |                              |                                    |                                    | median<br>log(costs)<br>  mortality | mean<br>log(costs)<br>unconditional | heart-related emergencies:<br>mean log (costs)<br>  mortality |
|                                           | (1)                            | (2)                          | (3)                                | (4)                                | (5)                                 | (6)                                 | (7)                                                           |
| Patient or Local-Area cost measure        | -0.029<br>(0.009)              | -0.022<br>(0.010)            |                                    | -0.031<br>(0.013)                  | -0.033<br>(0.009)                   | -0.027<br>(0.014)                   | -0.022<br>(0.0092)                                            |
| Mean log(costs)   mortality: 2nd quartile |                                |                              | -0.008<br>(0.007)                  |                                    |                                     |                                     |                                                               |
| Mean log(costs)   mortality: 3rd quartile |                                |                              | -0.017<br>(0.007)                  |                                    |                                     |                                     |                                                               |
| Mean log(costs)   mortality: Top quartile |                                |                              | -0.018<br>(0.007)                  |                                    |                                     |                                     |                                                               |
| Number of HSAs                            | 97                             | 97                           | 97                                 | 83                                 | 97                                  | 97                                  | 97                                                            |
| Observations                              | 36985                          | 27356                        | 37185                              | 28240                              | 37185                               | 37185                               | 37185                                                         |
| Mean of Dep. Var.                         | 0.058                          | 0.059                        | 0.058                              | 0.061                              | 0.058                               | 0.058                               | 0.058                                                         |

Each column represents a separate regression with full controls. Standard Errors are clustered at the Health Service Area level. All models are estimated using OLS, except column 1 that reports the estimated marginal effect on patient costs from a probit model. The number of observations is slightly smaller in the probit model due to the exclusion of cells with zero deaths. Column (5) uses the local-area measure calculated as the median of log(costs) for patients who died in the hospital, whereas column (6) uses the mean costs of all local emergency patients, whether or not they died in the hospital. Column (7) calculates the end-of-life cost measure for local patients with heart-related emergencies.



**Table A8: Robustness to Local Area Definitions**

| <u>Local Area</u>                                | <u>Treatment Intensity Measure</u>                                                            | <u>(#)</u> | <u>(Std. Dev.)</u> | <u>Mortality model</u> | <u>Obs.</u> |
|--------------------------------------------------|-----------------------------------------------------------------------------------------------|------------|--------------------|------------------------|-------------|
| Health Service Area &<br>Dartmouth Atlas Measure | Inpatient hospitalization reimbursements (in<br>thousands) per decedent: Last hospitalization | 73         | 3.979<br>(1.23)    | -0.006<br>(0.002)      | 34661       |
| ATS Metropolitan Area                            | mean log(Costs)   mortality:                                                                  | 14         | 9.24<br>(0.200)    | -0.036<br>(0.009)      | 37185       |
| Hospital                                         | mean log(Costs)   mortality:                                                                  | 189        | 9.20<br>(0.263)    | -0.023<br>(0.008)      | 37185       |
|                                                  | Teaching Hospital                                                                             | 189        | 0.073<br>(0.260)   | -0.013<br>(0.006)      | 37185       |

Each row represents a separate regression with full controls. The models are estimated by OLS and the standard errors are clustered at the respective area

Table A9: Hospital Charge Categories

**A. Visitors**

|                   | AMI Patients                |           |       |                      | Heart Patients              |           |       |                      |
|-------------------|-----------------------------|-----------|-------|----------------------|-----------------------------|-----------|-------|----------------------|
|                   | Coefficient<br>on EOL Costs | S.E.      | Obs.  | Mean of<br>Dep. Var. | Coefficient<br>on EOL Costs | S.E.      | Obs.  | Mean of<br>Dep. Var. |
| Room              | 303                         | (201)     | 15069 | 451                  | 287                         | (194)     | 37185 | 510                  |
| ICU               | 1,046                       | (370)**   | 15069 | 1220                 | 785                         | (275)**   | 37185 | 902                  |
| CCU               | 1,193                       | (414)**   | 15069 | 872                  | 713                         | (239)**   | 37185 | 569                  |
| Pharmacy          | 1,714                       | (433)**   | 15069 | 2656                 | 1,073                       | (215)**   | 37185 | 1691                 |
| Medical Devices   | 2,312                       | (1,010)*  | 15069 | 2496                 | 1,521                       | (603)*    | 37185 | 1784                 |
| Laboratory        | 1,391                       | (283)**   | 15069 | 1999                 | 1,047                       | (223)**   | 37185 | 1630                 |
| Radiology         | 264                         | (71)**    | 15069 | 339                  | 194                         | (42)**    | 37185 | 287                  |
| Nuclear Medicine  | 51                          | (24)*     | 15069 | 106                  | 92                          | (36)*     | 37185 | 152                  |
| CT Scan           | 98                          | (17)**    | 15069 | 154                  | 88                          | (15)**    | 37185 | 158                  |
| Operating Room    | 400                         | (276)     | 15069 | 699                  | 257                         | (143)     | 37185 | 390                  |
| Anesthesia        | 121                         | (84)      | 15069 | 141                  | 70                          | (43)      | 37185 | 77                   |
| Respiratory Svcs. | 1,001                       | (161)**   | 15069 | 504                  | 633                         | (85)**    | 37185 | 345                  |
| Physical Therapy  | 48                          | (10)**    | 15069 | 40                   | 30                          | (6)**     | 37185 | 37                   |
| Emergency Room    | 153                         | (46)**    | 15069 | 331                  | 152                         | (44)**    | 37185 | 308                  |
| Cardiology        | 461                         | (823)     | 15069 | 3048                 | 462                         | (412)     | 37185 | 1705                 |
| Recovery Room     | 77                          | (54)      | 15069 | 35                   | 49                          | (28)      | 37185 | 29                   |
| Other             | 1,016                       | (193)**   | 15069 | 1308                 | 624                         | (120)**   | 37185 | 945                  |
| log(Total)        | 0.608                       | (0.198)** | 15069 | 9.287                | 0.553                       | (0.104)** | 37185 | 8.862                |
| log(ICU & CCU)    | 0.842                       | (0.249)** | 13313 | 7.291                | 0.705                       | (0.194)** | 27160 | 7.117                |
| log(Diagnostic)   | 0.651                       | (0.145)** | 15065 | 7.436                | 0.575                       | (0.128)** | 37168 | 7.271                |
| log(Surgical)     | 0.384                       | (0.327)   | 13441 | 7.641                | 0.415                       | (0.187)*  | 30096 | 7.051                |
| log(other)        | 0.690                       | (0.199)** | 15068 | 8.466                | 0.572                       | (0.111)** | 37184 | 8.073                |

**B. Local Floridians**

|                   | AMI Patients                |           |        |                      | Heart Patients              |           |        |                      |
|-------------------|-----------------------------|-----------|--------|----------------------|-----------------------------|-----------|--------|----------------------|
|                   | Coefficient<br>on EOL Costs | S.E.      | Obs.   | Mean of<br>Dep. Var. | Coefficient<br>on EOL Costs | S.E.      | Obs.   | Mean of<br>Dep. Var. |
| Room              | 220                         | (143)     | 238926 | 413                  | 306                         | (166)     | 749762 | 508                  |
| ICU               | 1,246                       | (331)**   | 238926 | 1146                 | 827                         | (249)**   | 749762 | 827                  |
| CCU               | 678                         | (265)*    | 238926 | 775                  | 393                         | (158)*    | 749762 | 520                  |
| Pharmacy          | 1,305                       | (347)**   | 238926 | 2134                 | 680                         | (168)**   | 749762 | 1345                 |
| Medical Devices   | 1,636                       | (679)*    | 238926 | 1885                 | 1,051                       | (346)**   | 749762 | 1334                 |
| Laboratory        | 1,206                       | (250)**   | 238926 | 1872                 | 842                         | (200)**   | 749762 | 1510                 |
| Radiology         | 136                         | (58)*     | 238926 | 312                  | 103                         | (37)**    | 749762 | 270                  |
| Nuclear Medicine  | 47                          | (15)**    | 238926 | 97                   | 59                          | (20)**    | 749762 | 124                  |
| CT Scan           | 106                         | (20)**    | 238926 | 163                  | 97                          | (18)**    | 749762 | 157                  |
| Operating Room    | 202                         | (190)     | 238926 | 494                  | 117                         | (82)      | 749762 | 263                  |
| Anesthesia        | 75                          | (48)      | 238926 | 97                   | 41                          | (23)      | 749762 | 52                   |
| Respiratory Svcs. | 771                         | (120)**   | 238926 | 414                  | 476                         | (66)**    | 749762 | 305                  |
| Physical Therapy  | 42                          | (15)**    | 238926 | 51                   | 27                          | (12)*     | 749762 | 49                   |
| Emergency Room    | 162                         | (47)**    | 238926 | 300                  | 161                         | (44)**    | 749762 | 280                  |
| Cardiology        | 157                         | (967)     | 238926 | 2361                 | 194                         | (381)     | 749762 | 1139                 |
| Recovery Room     | 30                          | (30)      | 238926 | 26                   | 20                          | (14)      | 749762 | 24                   |
| Other             | 855                         | (183)**   | 238926 | 1167                 | 546                         | (109)**   | 749762 | 834                  |
| log(Total)        | 0.579                       | (0.155)** | 238926 | 9.184                | 0.540                       | (0.067)** | 749762 | 8.773                |
| log(ICU & CCU)    | 0.864                       | (0.152)** | 209447 | 7.294                | 0.756                       | (0.117)** | 534388 | 7.127                |
| log(Diagnostic)   | 0.574                       | (0.116)** | 238844 | 7.472                | 0.482                       | (0.107)** | 749352 | 7.292                |
| log(Surgical)     | 0.265                       | (0.361)   | 200591 | 7.420                | 0.283                       | (0.195)   | 524508 | 6.862                |
| log(other)        | 0.673                       | (0.138)** | 238925 | 8.346                | 0.586                       | (0.086)** | 749754 | 7.988                |

All models include full controls and average at least \$20 in costs. Costs are measured by charges deflated by a cost-to-charge ratio at the hospital x year level and expressed in 2003 dollars.

**Table A10: Selection Models**

| Dependent Variable: Mortality       |                                 |                    |                    |                   |
|-------------------------------------|---------------------------------|--------------------|--------------------|-------------------|
|                                     | Patient Group: Local Floridians |                    | Visitors           |                   |
|                                     | (1)                             | (2)                | (3)                | (4)               |
| County: mean log(costs)   mortality | -0.0062<br>(0.0058)             | -0.012<br>(0.0071) | -0.025<br>(0.0090) | -0.027<br>(0.012) |
| Control function                    | No                              | Yes                | No                 | Yes               |
| Number of Counties                  | 29                              |                    | 29                 |                   |
| Observations                        | 704780                          |                    | 34958              |                   |
| Mean of Dep. Var.                   | 0.058                           |                    | 0.058              |                   |

Each column represents a separate regression, and all models include full patient controls. Standard Errors are clustered at the county level. The control function is a fourth-ordered polynomial in the number of heart-disease related deaths that occur outside of the hospital in any given county-year, as well as the county population from the 2000 census.

Table A9: Hospital Charge Categories

**A. Visitors**

|                   | AMI Patients                |           |       |                      | Heart Patients              |           |       |                      |
|-------------------|-----------------------------|-----------|-------|----------------------|-----------------------------|-----------|-------|----------------------|
|                   | Coefficient<br>on EOL Costs | S.E.      | Obs.  | Mean of<br>Dep. Var. | Coefficient<br>on EOL Costs | S.E.      | Obs.  | Mean of<br>Dep. Var. |
| Room              | 303                         | (201)     | 15069 | 451                  | 287                         | (194)     | 37185 | 510                  |
| ICU               | 1,046                       | (370)**   | 15069 | 1220                 | 785                         | (275)**   | 37185 | 902                  |
| CCU               | 1,193                       | (414)**   | 15069 | 872                  | 713                         | (239)**   | 37185 | 569                  |
| Pharmacy          | 1,714                       | (433)**   | 15069 | 2656                 | 1,073                       | (215)**   | 37185 | 1691                 |
| Medical Devices   | 2,312                       | (1,010)*  | 15069 | 2496                 | 1,521                       | (603)*    | 37185 | 1784                 |
| Laboratory        | 1,391                       | (283)**   | 15069 | 1999                 | 1,047                       | (223)**   | 37185 | 1630                 |
| Radiology         | 264                         | (71)**    | 15069 | 339                  | 194                         | (42)**    | 37185 | 287                  |
| Nuclear Medicine  | 51                          | (24)*     | 15069 | 106                  | 92                          | (36)*     | 37185 | 152                  |
| CT Scan           | 98                          | (17)**    | 15069 | 154                  | 88                          | (15)**    | 37185 | 158                  |
| Operating Room    | 400                         | (276)     | 15069 | 699                  | 257                         | (143)     | 37185 | 390                  |
| Anesthesia        | 121                         | (84)      | 15069 | 141                  | 70                          | (43)      | 37185 | 77                   |
| Respiratory Svcs. | 1,001                       | (161)**   | 15069 | 504                  | 633                         | (85)**    | 37185 | 345                  |
| Physical Therapy  | 48                          | (10)**    | 15069 | 40                   | 30                          | (6)**     | 37185 | 37                   |
| Emergency Room    | 153                         | (46)**    | 15069 | 331                  | 152                         | (44)**    | 37185 | 308                  |
| Cardiology        | 461                         | (823)     | 15069 | 3048                 | 462                         | (412)     | 37185 | 1705                 |
| Recovery Room     | 77                          | (54)      | 15069 | 35                   | 49                          | (28)      | 37185 | 29                   |
| Other             | 1,016                       | (193)**   | 15069 | 1308                 | 624                         | (120)**   | 37185 | 945                  |
| log(Total)        | 0.608                       | (0.198)** | 15069 | 9.287                | 0.553                       | (0.104)** | 37185 | 8.862                |
| log(ICU & CCU)    | 0.842                       | (0.249)** | 13313 | 7.291                | 0.705                       | (0.194)** | 27160 | 7.117                |
| log(Diagnostic)   | 0.651                       | (0.145)** | 15065 | 7.436                | 0.575                       | (0.128)** | 37168 | 7.271                |
| log(Surgical)     | 0.384                       | (0.327)   | 13441 | 7.641                | 0.415                       | (0.187)*  | 30096 | 7.051                |
| log(other)        | 0.690                       | (0.199)** | 15068 | 8.466                | 0.572                       | (0.111)** | 37184 | 8.073                |

**B. Local Floridians**

|                   | AMI Patients                |           |        |                      | Heart Patients              |           |        |                      |
|-------------------|-----------------------------|-----------|--------|----------------------|-----------------------------|-----------|--------|----------------------|
|                   | Coefficient<br>on EOL Costs | S.E.      | Obs.   | Mean of<br>Dep. Var. | Coefficient<br>on EOL Costs | S.E.      | Obs.   | Mean of<br>Dep. Var. |
| Room              | 220                         | (143)     | 238926 | 413                  | 306                         | (166)     | 749762 | 508                  |
| ICU               | 1,246                       | (331)**   | 238926 | 1146                 | 827                         | (249)**   | 749762 | 827                  |
| CCU               | 678                         | (265)*    | 238926 | 775                  | 393                         | (158)*    | 749762 | 520                  |
| Pharmacy          | 1,305                       | (347)**   | 238926 | 2134                 | 680                         | (168)**   | 749762 | 1345                 |
| Medical Devices   | 1,636                       | (679)*    | 238926 | 1885                 | 1,051                       | (346)**   | 749762 | 1334                 |
| Laboratory        | 1,206                       | (250)**   | 238926 | 1872                 | 842                         | (200)**   | 749762 | 1510                 |
| Radiology         | 136                         | (58)*     | 238926 | 312                  | 103                         | (37)**    | 749762 | 270                  |
| Nuclear Medicine  | 47                          | (15)**    | 238926 | 97                   | 59                          | (20)**    | 749762 | 124                  |
| CT Scan           | 106                         | (20)**    | 238926 | 163                  | 97                          | (18)**    | 749762 | 157                  |
| Operating Room    | 202                         | (190)     | 238926 | 494                  | 117                         | (82)      | 749762 | 263                  |
| Anesthesia        | 75                          | (48)      | 238926 | 97                   | 41                          | (23)      | 749762 | 52                   |
| Respiratory Svcs. | 771                         | (120)**   | 238926 | 414                  | 476                         | (66)**    | 749762 | 305                  |
| Physical Therapy  | 42                          | (15)**    | 238926 | 51                   | 27                          | (12)*     | 749762 | 49                   |
| Emergency Room    | 162                         | (47)**    | 238926 | 300                  | 161                         | (44)**    | 749762 | 280                  |
| Cardiology        | 157                         | (967)     | 238926 | 2361                 | 194                         | (381)     | 749762 | 1139                 |
| Recovery Room     | 30                          | (30)      | 238926 | 26                   | 20                          | (14)      | 749762 | 24                   |
| Other             | 855                         | (183)**   | 238926 | 1167                 | 546                         | (109)**   | 749762 | 834                  |
| log(Total)        | 0.579                       | (0.155)** | 238926 | 9.184                | 0.540                       | (0.067)** | 749762 | 8.773                |
| log(ICU & CCU)    | 0.864                       | (0.152)** | 209447 | 7.294                | 0.756                       | (0.117)** | 534388 | 7.127                |
| log(Diagnostic)   | 0.574                       | (0.116)** | 238844 | 7.472                | 0.482                       | (0.107)** | 749352 | 7.292                |
| log(Surgical)     | 0.265                       | (0.361)   | 200591 | 7.420                | 0.283                       | (0.195)   | 524508 | 6.862                |
| log(other)        | 0.673                       | (0.138)** | 238925 | 8.346                | 0.586                       | (0.086)** | 749754 | 7.988                |

All models include full controls and average at least \$20 in costs. Costs are measured by charges deflated by a cost-to-charge ratio at the hospital x year level and expressed in 2003 dollars.

**Table A10: Selection Models**

| Dependent Variable: Mortality       |                     |                    |                    |                   |
|-------------------------------------|---------------------|--------------------|--------------------|-------------------|
|                                     | Patient Group:      |                    | Visitors           |                   |
|                                     | Local Floridians    |                    |                    |                   |
|                                     | (1)                 | (2)                | (3)                | (4)               |
| County: mean log(costs)   mortality | -0.0062<br>(0.0058) | -0.012<br>(0.0071) | -0.025<br>(0.0090) | -0.027<br>(0.012) |
| Control function                    | No                  | Yes                | No                 | Yes               |
| Number of Counties                  | 29                  |                    | 29                 |                   |
| Observations                        | 704780              |                    | 34958              |                   |
| Mean of Dep. Var.                   | 0.058               |                    | 0.058              |                   |

Each column represents a separate regression, and all models include full patient controls. Standard Errors are clustered at the county level. The control function is a fourth-ordered polynomial in the number of heart-disease related deaths that occur outside of the hospital in any given county-year, as well as the county population from the 2000 census.
